# Supplementary material
Source: PubMed Central journal article supplement (PMC3934999)
Supplement: supp_mjs065_mjs065supp.pdf [file supp_mjs065_mjs065supp.pdf]

## Supplementary figures

### Supplementary figure 1

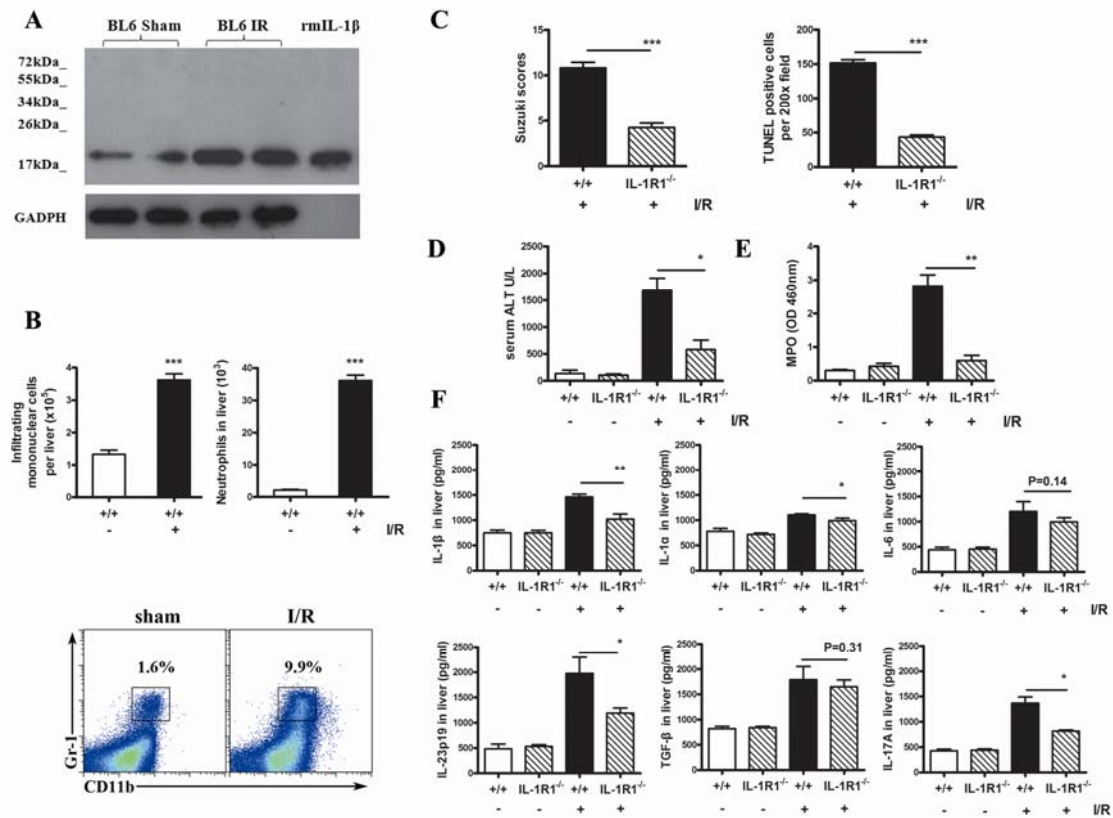

**Figure S1. IL-1R1 deficient mice attenuated I/R injury and IL-17A expression**

C57BL/6 mice and IL-1R1 deficient mice underwent I/R surgery or sham operation (white bar) and livers were collected 6h after reperfusion.

(A) Western blot analysis for hepatic IL-1β expression. (B) Total infiltrating leucocytes were isolated from livers, counted and further characterized as Gr-1<sup>hi</sup>CD11b<sup>+</sup> neutrophils by flow cytometry. (C) Hepatic I/R lesions from C57BL/6 and IL-1R1<sup>-/-</sup> mice were graded using the Suzuki score. TUNEL positive cells were counted as described previously (200x). (D) Serum ALT level, (E) hepatic MPO activity from C57BL/6 and IL-1R1<sup>-/-</sup> mice as compared to C57BL/6 mice following I/R and sham operation. (F) IL-1β, IL-1α, IL-6, IL-23/p19, TGF-β and IL-17A

protein levels in liver homogenate (ELISA). The data represent the mean  $\pm$  SEM (n=6-8 mice per group from three independent experiments, significant difference: \* p < 0.05, \*\* p < 0.01).

### Supplementary figure 2

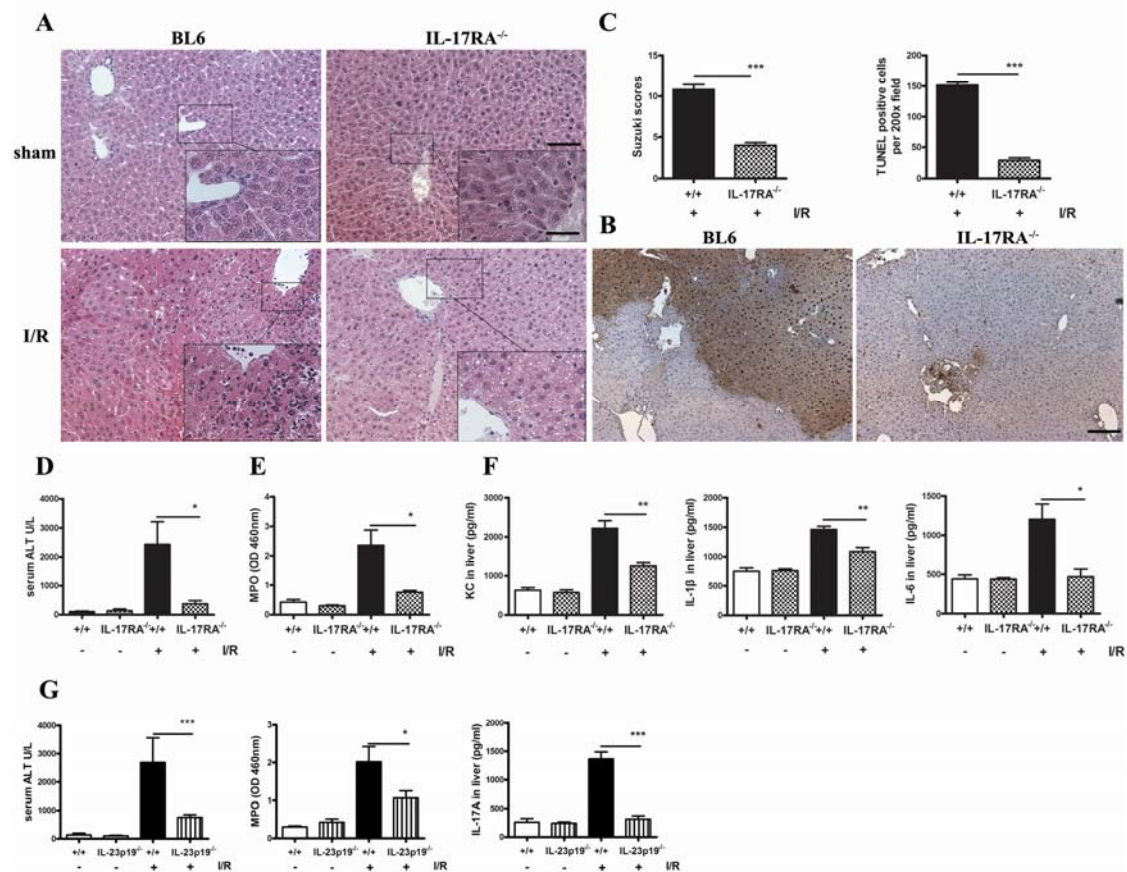

**Figure S2. IL-17RA deficient mice are protected from hepatic I/R**

IL-17RA<sup>-/-</sup> mice and C57BL/6 mice were subjected to I/R or sham surgery as described before.

(A) Representative H&E (200x, 400x) and (B) TUNEL staining (200x) of liver from C57BL/6 and IL-17A<sup>-/-</sup> mice subjected to I/R are shown. (C) Grading of I/R lesion were use the Suzuki scores and TUNEL positive cells were counted as described. (D)

Serum ALT levels, (E) hepatic neutrophil recruitment (MPO activity) (F). KC, IL-1 $\beta$  and IL-6 from liver homogenates (ELISA) from C57BL/6 and IL-17RA<sup>-/-</sup> mice which were subjected to I/R. The data represent as mean  $\pm$  SEM (n=6-8 mice per group from three independent experiments, \* p < 0.05, \*\* p<0.01). (G) IL-23p19 knock-out mice subjected to I/R injury were measured for serum ALT activity, hepatic MPO activity and IL-17A concentration in tissue. The data represent the mean  $\pm$  SEM (n=6-8 mice per group from three independent experiments, significant difference:\* p < 0.05, \*\* p<0.01).

### Supplementary figure 3

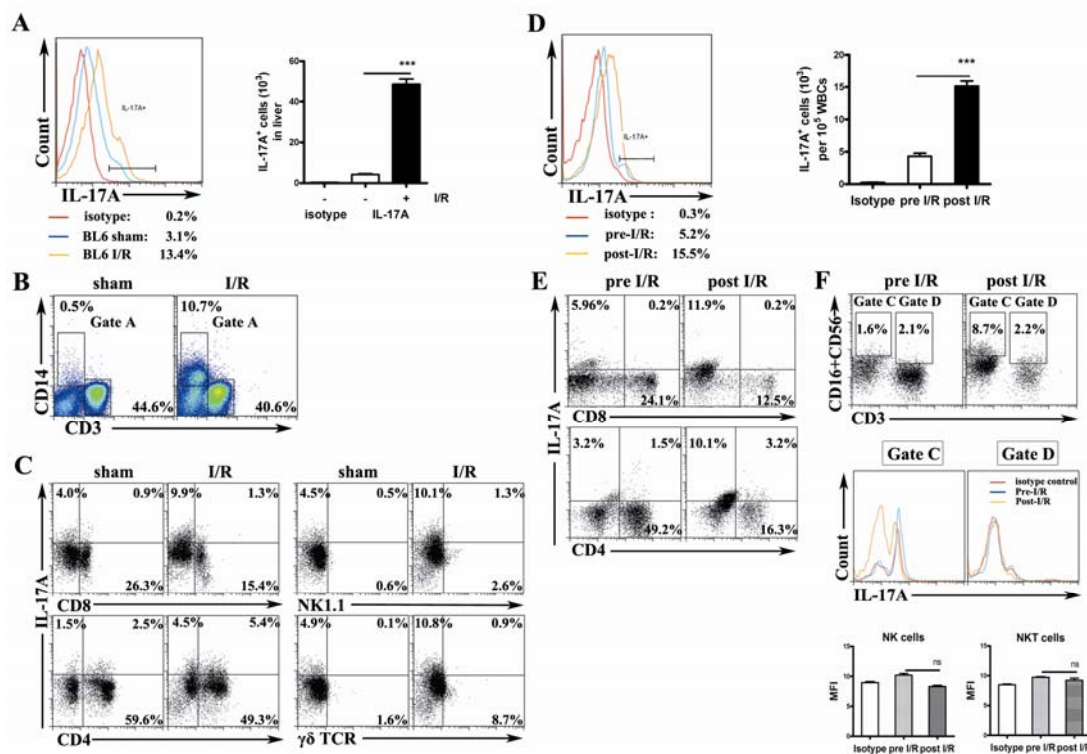

**Figure S3. Neutrophils and CD4<sup>+</sup> T cells are the main source of IL-17A in the liver upon I/R challenge in mice and human patients**

Infiltrating mononuclear cells isolated from the mouse liver 6h after I/R and controls

(A-C). (A) Cells were permeabilized, stained by IL-17A specific antibodies and analyzed by FACS. Proportions and absolutely number of IL-17A positive cells are presented. (B) Analysis of CD3<sup>+</sup> and CD14<sup>+</sup> cells as described. (C) CD4<sup>+</sup> T cells, CD8<sup>+</sup> T cells, NKT and  $\gamma\delta$  TCR<sup>+</sup> cells were analyzed based on CD3<sup>+</sup>CD14<sup>-</sup> gate. Results from one representative experiment of three independent studies (n=5 mice per group).

Investigations on PBMC from human patients following partial hepatectomy (D-F): (D) IL-17A staining histogram of PMA/ionomycin stimulated human PBMC (left panel), absolute numbers of IL-17A<sup>+</sup> cells (right panel) from patients performed before and after partial hepatectomy. (E) CD4 and CD8 T cells were measured for IL-17A expression. (F) CD3<sup>+</sup>CD16<sup>+</sup>CD56<sup>+</sup> or CD3<sup>-</sup>CD16<sup>+</sup>CD56<sup>+</sup> measured by histogram and median fluorescence intensity to identify NK and NKT cells. Data are presented as MFI value  $\pm$  SEM. \* (p<0.05; \*\*, P<0.001, student t test). Results from flow cytometry are from one representative experiment of 7 independent studies.
